# Supplementary material
Source: HighWire-hosted journal article supplement (https://bmjopen.bmj.com/content/7/11/e016155)
Supplement: inline-supplementary-material-4 [file inline-supplementary-material-4.pdf]

| Outcome as described by author         | Wording used to measure outcome (where reported)               | Who reported the outcome | Rating/measurement scale                                      | Assessment time point | Study reference | Study source * |
|----------------------------------------|----------------------------------------------------------------|--------------------------|---------------------------------------------------------------|-----------------------|-----------------|----------------|
| Pain                                   | -                                                              | Patient reported         | 0 to 10 cm VAS                                                | Day 1, Day 10         | Amin 2009       | 2,3            |
| Cosmesis of wound                      | Cosmesis of wound                                              | Patient reported         | Poor 0 5 Excellent 10                                         | 3 months post-op      | Amin 2009       | 2,3            |
| Ability to shower same day             | Ability to shower same day                                     | Patient reported         | Poor (0) Satisfactory (1) Excellent(2)                        | 3 months post-op      | Amin 2009       | 2,3            |
| Need visit GP for wound care           | Need visit GP for wound care                                   | Patient reported         | "Could have done without; Didn't mind; N/A"                   | 3 months post-op      | Amin 2009       | 2,3            |
| Pain on removing clips                 | Pain on removing clips                                         | Patient reported         | Yes/No                                                        | 3 months post-op      | Amin 2009       | 2,3            |
| Pain/Tightness of wound after 3 months | Pain/Tightness of wound after 3 months                         | Patient reported         | Slight(0)Moderate(1)Significant(2)                            | 3 months post-op      | Amin 2009       | 2,3            |
| Overall comfort with wound             | Overall comfort with wound                                     | Patient reported         | Poor(0)Satisfactory(1)Excellent(2)                            | 3 months post-op      | Amin 2009       | 2,3            |
| Allergic reactions                     | Allergic reactions                                             | Patient reported         | Yes(0)No(1)                                                   | 3 months post-op      | Amin 2009       | 2,3            |
| Overall satisfaction                   | Overall satisfaction                                           | Patient reported         | Poor 0; 5; 10 Excellent                                       | 3 months post-op      | Amin 2009       | 2,3            |
| Cosmetic appearance                    | How would you evaluate your skin stitches after the operation? | Patient reported         | 1 (very poor) 2 (poor) 3 (medium) 4 (good) 5 (very good)      | Day 40 post-op        | Asvar 2009      | 2              |
| Satisfaction                           | What is your satisfaction?                                     | Patient reported         | 1 (very poor) 2 (poor) 3 (medium) 4 (good) 5 (very good)      | Day 40 post-op        | Asvar 2009      | 2              |
| Perceived patient satisfaction         | -                                                              | Physician reported       | "Ratings"                                                     | Day 10                | Blondeel 2004   | 2,3            |
| Cosmesis                               | -                                                              | Patient reported         | "Ratings" – unspecified categories but included "outstanding" | Day 10                | Blondeel 2004   | 2,3            |
| Overall comfort                        | -                                                              | Patient reported         | "Ratings"                                                     | Day 10                | Blondeel 2004   | 2,3            |

\* 1= Cochrane 2011 dressings review; 2= Cochrane 2014 tissue adhesive review; 3=Chow 2010 tissue adhesive review; 4=additional studies provided by authors of the Cochrane dressings review update

| Outcome as described by author   | Wording used to measure outcome (where reported) | Who reported the outcome | Rating/measurement scale                | Assessment time point                                                                                              | Study reference | Study source * |
|----------------------------------|--------------------------------------------------|--------------------------|-----------------------------------------|--------------------------------------------------------------------------------------------------------------------|-----------------|----------------|
| Ability to shower                | -                                                | Patient reported         | "Ratings"                               | Day 10                                                                                                             | Blondeel 2004   | 2,3            |
| Dressing changes                 | -                                                | Patient reported         | "Ratings"                               | Day 10                                                                                                             | Blondeel 2004   | 2,3            |
| Tension at the wound             | -                                                | Patient reported         | "Ratings"                               | Day 10                                                                                                             | Blondeel 2004   | 2,3            |
| Hygiene problems                 | -                                                | Patient reported         | "Ratings"                               | Day 10                                                                                                             | Blondeel 2004   | 2,3            |
| Allergic reaction                | -                                                | Patient reported         | "Ratings"                               | Day 10                                                                                                             | Blondeel 2004   | 2,3            |
| Overall satisfaction             | -                                                | Patient reported         | "Ratings"                               | Day 10                                                                                                             | Blondeel 2004   | 2,3            |
| Cosmesis                         | -                                                | Physician reported       | validated Modified Hollander Instrument | Day 30                                                                                                             | Blondeel 2004   | 2,3            |
| Dressing changes                 | -                                                | Observer reported        | n/a                                     | unspecified                                                                                                        | Burke 2012      | 4              |
| Incidence of blistering          | -                                                | Observer reported        | n/a                                     | unspecified                                                                                                        | Burke 2012      | 4              |
| Cosmetic outcome                 | -                                                | Unspecified              | Scale, 1-10                             | Unclear when specific outcomes were recorded – several follow ups at Day 1, 3, 5-7 and 2 weeks, 1, 3, 6, 12 months | Chibbaro 2009   | 2,3            |
| Wound management by the patients | -                                                | Unspecified              | Unspecified                             | Unclear when specific outcomes were recorded – several follow ups at Day 1, 3, 5-7 and 2 weeks, 1, 3, 6, 12 months | Chibbaro 2009   | 2,3            |
| Satisfaction                     | -                                                | Patient reported         | Scale, 1-10                             | Unclear when specific outcomes were recorded – several follow ups at Day 1, 3,                                     | Chibbaro 2009   | 2,3            |

\* 1= Cochrane 2011 dressings review; 2= Cochrane 2014 tissue adhesive review; 3=Chow 2010 tissue adhesive review; 4=additional studies provided by authors of the Cochrane dressings review update

| Outcome as described by author          | Wording used to measure outcome (where reported) | Who reported the outcome                               | Rating/measurement scale | Assessment time point                                                                                              | Study reference | Study source * |
|-----------------------------------------|--------------------------------------------------|--------------------------------------------------------|--------------------------|--------------------------------------------------------------------------------------------------------------------|-----------------|----------------|
|                                         |                                                  |                                                        |                          | 5-7 and 2 weeks, 1, 3, 6, 12 months                                                                                |                 |                |
| Appreciation of possibility to shower   | -                                                | Unspecified                                            | Unspecified              | Unclear when specific outcomes were recorded – several follow ups at Day 1, 3, 5-7 and 2 weeks, 1, 3, 6, 12 months | Chibbaro 2009   | 2,3            |
| Appreciation of absence of head bandage | -                                                | Unspecified                                            | Unspecified              | Unclear when specific outcomes were recorded – several follow ups at Day 1, 3, 5-7 and 2 weeks, 1, 3, 6, 12 months | Chibbaro 2009   | 2,3            |
| Number of dressing changes              | -                                                | Collected by surgeons, nurses and junior medical staff | n/a                      | during hospital stay                                                                                               | Cosker 2005     | 1              |
| Blistering                              | -                                                | Collected by surgeons, nurses and junior medical staff | n/a                      | during hospital stay                                                                                               | Cosker 2005     | 1              |
| When the dressing required changing     | -                                                | Collected by surgeons, nurses and junior medical staff | n/a                      | during hospital stay                                                                                               | Cosker 2005     | 1              |
| Reason for dressing change              | -                                                | Collected by surgeons, nurses and junior medical staff | n/a                      | during hospital stay                                                                                               | Cosker 2005     | 1              |
| Number of post operative days           | -                                                | Collected by surgeons, nurses and junior medical staff | n/a                      | during hospital stay                                                                                               | Cosker 2005     | 1              |

\* 1= Cochrane 2011 dressings review; 2= Cochrane 2014 tissue adhesive review; 3=Chow 2010 tissue adhesive review; 4=additional studies provided by authors of the Cochrane dressings review update

| <b>Outcome as described by author</b>             | <b>Wording used to measure outcome (where reported)</b> | <b>Who reported the outcome</b>                        | <b>Rating/measurement scale</b>                                                                                  | <b>Assessment time point</b>                 | <b>Study reference</b> | <b>Study source *</b> |
|---------------------------------------------------|---------------------------------------------------------|--------------------------------------------------------|------------------------------------------------------------------------------------------------------------------|----------------------------------------------|------------------------|-----------------------|
| Volume of wound exudate                           | -                                                       | Collected by surgeons, nurses and junior medical staff | Amount of seepage through the dressing and the apparent volume found on the wound after the dressing was removed | during hospital stay                         | Cosker 2005            | 1                     |
| Satisfaction with wound closure method            | -                                                       | Patient reported                                       | Satisfied / Dissatisfied                                                                                         | 24 to 48 hrs, 4 to 6 weeks, 3 months post-op | Dowson 2006            | 2,3                   |
| Satisfaction with appearance of the wound         | -                                                       | Patient reported                                       | Satisfied / Dissatisfied                                                                                         | 24 to 48 hrs, 4 to 6 weeks, 3 months post-op | Dowson 2006            | 2,3                   |
| Degree of pain                                    | -                                                       | Patient reported                                       | Scale, 1-10                                                                                                      | First 3 weeks after surgery                  | Gennari 2004           | 3                     |
| Ease of managing wound                            | -                                                       | Patient reported                                       | Scale, 1-10                                                                                                      | First 3 weeks after surgery                  | Gennari 2004           | 3                     |
| Ability to take a shower                          | -                                                       | Patient reported                                       | Scale, 1-10                                                                                                      | First 3 weeks after surgery                  | Gennari 2004           | 3                     |
| Postoperative visits                              | -                                                       | Patient reported                                       | Scale, 1-10                                                                                                      | First 3 weeks after surgery                  | Gennari 2004           | 3                     |
| Use of dressings                                  | -                                                       | Patient reported                                       | Scale, 1-10                                                                                                      | First 3 weeks after surgery                  | Gennari 2004           | 3                     |
| Comfort                                           | -                                                       | Interview with physician                               | Unspecified                                                                                                      | 1, 2, & 4 weeks post-op                      | Greene 1999            | 2,3                   |
| Presence of a pulling sensation                   | -                                                       | Interview with physician                               | Unspecified                                                                                                      | 1, 2, & 4 weeks post-op                      | Greene 1999            | 2,3                   |
| Appreciation of the lack of suture removal        | -                                                       | Interview with physician                               | Unspecified                                                                                                      | 1, 2, & 4 weeks post-op                      | Greene 1999            | 2,3                   |
| Discomfort in connection with removal of dressing | -                                                       | Unspecified                                            | Unspecified                                                                                                      | during hospital stay                         | Holm 1998              | 1                     |
| Number of dressing changes                        | -                                                       | Observer reported                                      | n/a                                                                                                              | during hospital stay                         | Holm 1998              | 1                     |

\* 1= Cochrane 2011 dressings review; 2= Cochrane 2014 tissue adhesive review; 3=Chow 2010 tissue adhesive review; 4=additional studies provided by authors of the Cochrane dressings review update

| <b>Outcome as described by author</b> | <b>Wording used to measure outcome (where reported)</b> | <b>Who reported the outcome</b> | <b>Rating/measurement scale</b>                    | <b>Assessment time point</b>     | <b>Study reference</b> | <b>Study source *</b> |
|---------------------------------------|---------------------------------------------------------|---------------------------------|----------------------------------------------------|----------------------------------|------------------------|-----------------------|
| Adhesion of dressing to the skin      | -                                                       | Observer reported               | Unspecified                                        | daily inspection until discharge | Holm 1998              | 1                     |
| Cosmetic result                       | -                                                       | Observer reported               | 1 to 5 (higher=better)                             | 3 months post-op                 | Holm 1998              | 1                     |
| Width of the scar                     | -                                                       | Observer reported               | 1 to 5 (higher=better)                             | 3 months post-op                 | Holm 1998              | 1                     |
| Downbinding of the scar               | -                                                       | Observer reported               | 1 to 5 (higher=better)                             | 3 months post-op                 | Holm 1998              | 1                     |
| Colour of the scar                    | -                                                       | Observer reported               | 1 to 5 (higher=better)                             | 3 months post-op                 | Holm 1998              | 1                     |
| Elevation of the scar                 | -                                                       | Observer reported               | 1 to 5 (higher=better)                             | 3 months post-op                 | Holm 1998              | 1                     |
| Cosmetic outcome                      | -                                                       | Observer reported               | 1 to 5 (higher=better)                             | 3 months post-op                 | Holm 1998              | 1                     |
| Supposed inconvenience of the scar    | -                                                       | Observer reported               | 1 to 5 (higher=better)                             | 3 months post-op                 | Holm 1998              | 1                     |
| Exudate                               | -                                                       | Observer reported               | Unspecified                                        | daily inspection until discharge | Holm 1998              | 1                     |
| Leakage                               | -                                                       | Observer reported               | Unspecified                                        | daily inspection until discharge | Holm 1998              | 1                     |
| Transparency                          | -                                                       | Observer reported               | Unspecified, but included milky and slightly milky | daily inspection until discharge | Holm 1998              | 1                     |
| Dressing changes                      | -                                                       | Observer reported               | No. of days stayed in place                        | unspecified                      | Holm 1998              | 1                     |
| Reasons for dressing changes          | -                                                       | Observer reported               | Unspecified                                        | unspecified                      | Holm 1998              | 1                     |
| Maceration of the skin                | -                                                       | Observer reported               | Unspecified                                        | unspecified                      | Holm 1998              | 1                     |
| Post operative wound infection        | -                                                       | Observer reported               | Unspecified                                        | unspecified                      | Holm 1998              | 1                     |
| Comfort                               | -                                                       | Observer reported               | Yes/No                                             | 1 week and 1 month               | Keng 1989              | 2                     |
| Cosmesis                              | -                                                       | Observer reported               | 1 (poor) to 5 (excellent)                          | 1 week and 1 month               | Keng 1989              | 2                     |

\* 1= Cochrane 2011 dressings review; 2= Cochrane 2014 tissue adhesive review; 3=Chow 2010 tissue adhesive review; 4=additional studies provided by authors of the Cochrane dressings review update

| Outcome as described by author                   | Wording used to measure outcome (where reported) | Who reported the outcome                          | Rating/measurement scale                                           | Assessment time point          | Study reference   | Study source * |
|--------------------------------------------------|--------------------------------------------------|---------------------------------------------------|--------------------------------------------------------------------|--------------------------------|-------------------|----------------|
| Satisfaction with the incision closure           | -                                                | Patient verbal report; response recorded by staff | Either "satisfied" or "dissatisfied"                               | 3 month follow up              | Kent 2014         | 2              |
| Overall appearance                               | -                                                | Patient verbal report; response recorded by staff | Either "satisfied" or "dissatisfied"                               | 3 month follow up              | Kent 2014         | 2              |
| Satisfaction with the techniques of skin closure | -                                                | Patient reported                                  | VAS between 0 and 100, where 100 represented maximal satisfaction. | Between 8 and 12 weeks post-op | Khan 2006         | 2,3            |
| Dressing or superficial wound discomfort         | -                                                | Unspecified                                       | Linear analogue scale                                              | 5 days post -op                | Law 1987          | 1              |
| Dressing preference                              | -                                                | Unspecified                                       | Unspecified                                                        | unspecified                    | Law 1987          | 1              |
| Wound infection                                  | -                                                | Unspecified                                       | Discharge of purulent material                                     | unspecified                    | Law 1987          | 1              |
| Number of dressing changes                       | -                                                | Unspecified                                       | n/a                                                                | unspecified                    | Law 1987          | 1              |
| Quality of the final scar                        | -                                                | Unspecified                                       | Unspecified                                                        | unspecified                    | Law 1987          | 1              |
| Blisters                                         | -                                                | Observer reported                                 | Defined as any lifting of the epidermis with underlying fluid      | 48 hours post-op and 5 days    | Lawrentschuk 2002 | 1              |
| Wound condition                                  | -                                                | Observer reported                                 | Unspecified                                                        | 5 days                         | Lawrentschuk 2002 | 1              |
| Swelling                                         | -                                                | Observer reported                                 | Measured thigh girth                                               | 48 hours post-op and 5 days    | Lawrentschuk 2002 | 1              |
| Wound infection                                  | -                                                | Observer reported                                 | Unspecified                                                        | unspecified                    | Lawrentschuk 2002 | 1              |
| Cosmetic appearance                              | -                                                | Patient reported                                  | 100mm VAS (0 worst outcome, 100 best outcome)                      | 3 months                       | Livesey 2009      | 2,3            |
| Satisfaction with the scar                       | -                                                | Patient reported                                  | 100mm VAS (0 extreme dissatisfaction, 100 complete satisfaction)   | 3 months                       | Livesey 2009      | 2,3            |

\* 1= Cochrane 2011 dressings review; 2= Cochrane 2014 tissue adhesive review; 3=Chow 2010 tissue adhesive review; 4=additional studies provided by authors of the Cochrane dressings review update

| Outcome as described by author               | Wording used to measure outcome (where reported)                            | Who reported the outcome     | Rating/measurement scale                                                                                                                        | Assessment time point                     | Study reference | Study source * |
|----------------------------------------------|-----------------------------------------------------------------------------|------------------------------|-------------------------------------------------------------------------------------------------------------------------------------------------|-------------------------------------------|-----------------|----------------|
| Appearance of the wound                      | -                                                                           | Patient reported             | 5 point Likert scale (1=much better than expected, 2= better than expected, 3= as expected, 4= worse than expected, 5=much worse than expected) | 3 months                                  | Livesey 2009    | 2,3            |
| Discomfort (pain in the past 48 hrs)         | -                                                                           | Patient reported             | 0 to 10 cm VAS                                                                                                                                  | 2-3 & 7-10 days post-op                   | Michie 1994     | 1              |
| Discomfort (pain on removal of the dressing) | -                                                                           | Patient reported             | 0 to 10 cm VAS                                                                                                                                  | 2-3 & 7-10 days post-op                   | Michie 1994     | 1              |
| Overall comfort                              | -                                                                           | Patient reported             | 0 to 10 cm VAS                                                                                                                                  | 2-3 & 7-10 days post-op                   | Michie 1994     | 1              |
| Wound itching (in the past 48hrs)            | -                                                                           | Patient reported             | 0 to 10 cm VAS                                                                                                                                  | 2-3, 7-10 days, 4 weeks, 7 months post-op | Michie 1994     | 1              |
| Wound pulling (in the past 48 hrs)           | -                                                                           | Patient reported             | 0 to 10 cm VAS                                                                                                                                  | 2-3, 7-10 days, 4 weeks, 7 months post-op | Michie 1994     | 1              |
| Conformability of the dressing to the wound  | -                                                                           | Surgeon reported             | 4 point rating scale (excellent, good, fair, poor)                                                                                              | 7-10 days post-op                         | Michie 1994     | 1              |
| Ability to contain exudate                   | -                                                                           | Surgeon reported             | 4 point rating scale (excellent, good, fair, poor)                                                                                              | 7-10 days post-op                         | Michie 1994     | 1              |
| Ability to protect the wound                 | -                                                                           | Surgeon reported             | 4 point rating scale (excellent, good, fair, poor)                                                                                              | 7-10 days post-op                         | Michie 1994     | 1              |
| Ability to facilitate mobility               | -                                                                           | Surgeon reported             | 4 point rating scale (excellent, good, fair, poor)                                                                                              | 7-10 days post-op                         | Michie 1994     | 1              |
| Ability to facilitate personal hygiene       | -                                                                           | Surgeon reported             | 4 point rating scale (excellent, good, fair, poor)                                                                                              | 7-10 days post-op                         | Michie 1994     | 1              |
| Overall impression of the incision           | -                                                                           | Patient reported             | 0 to 10 cm VAS                                                                                                                                  | 2-3 & 7-10 days post-op                   | Michie 1994     | 1              |
| Evaluation of resulting scar                 | Pigmentation, scar colour, presence of inflammation, suppleness/pliability, | Patient and surgeon reported | modified Vancouver Burn Assessment Scale (0 to 3 score)                                                                                         | 4 weeks and 7 months post-op              | Michie 1994     | 1              |

\* 1= Cochrane 2011 dressings review; 2= Cochrane 2014 tissue adhesive review; 3=Chow 2010 tissue adhesive review; 4=additional studies provided by authors of the Cochrane dressings review update

| Outcome as described by author                                                                                                                                                         | Wording used to measure outcome (where reported) | Who reported the outcome  | Rating/measurement scale                                                  | Assessment time point                                                                                                      | Study reference | Study source * |
|----------------------------------------------------------------------------------------------------------------------------------------------------------------------------------------|--------------------------------------------------|---------------------------|---------------------------------------------------------------------------|----------------------------------------------------------------------------------------------------------------------------|-----------------|----------------|
|                                                                                                                                                                                        | scar height/evenness with the surrounding skin   |                           |                                                                           |                                                                                                                            |                 |                |
| Ease of dressing application                                                                                                                                                           | -                                                | Surgeon reported          | Yes/No                                                                    | 2-3 & 7-10 days post-op                                                                                                    | Michie 1994     | 1              |
| Ease of dressing removal                                                                                                                                                               | -                                                | Surgeon reported          | Yes/somewhat difficult                                                    | 2-3 & 7-10 days post-op                                                                                                    | Michie 1994     | 1              |
| Cosmetic result                                                                                                                                                                        | -                                                | Surgeon reported          | 4 point rating scale (excellent, good, fair, poor)                        | 7-10 days post-op                                                                                                          | Michie 1994     | 1              |
| Infection                                                                                                                                                                              | -                                                | Surgeon reported          | Unspecified                                                               | 2-3 & 7-10 days post-op                                                                                                    | Michie 1994     | 1              |
| Pain upon palpation of the wound                                                                                                                                                       | -                                                | Surgeon reported          | 3 point scale including Somewhat/no                                       | 7-10 days post-op                                                                                                          | Michie 1994     | 1              |
| Overall wound aspect                                                                                                                                                                   | -                                                | Surgeon reported          | 3 point scale including Excellent/good                                    | 7-10 days post-op                                                                                                          | Michie 1994     | 1              |
| Overall recovery                                                                                                                                                                       | -                                                | Surgeon reported          | 3 point scale including Excellent                                         | 7-10 days post-op                                                                                                          | Michie 1994     | 1              |
| Presence of small stitch abscess                                                                                                                                                       | -                                                | Surgeon reported          | Yes/no                                                                    | 7-10 days post-op                                                                                                          | Michie 1994     | 1              |
| Satisfaction with wound cosmesis                                                                                                                                                       | -                                                | Parent reported           | 100mm VAS                                                                 | 2 to 3 weeks and 3 months follow up assessment (although unable to complete latter assessment as only 9 patients returned) | Ong 2002        | 2,3            |
| Level of satisfaction with early postoperative management of the wound (regarding requirement of a return visit for medications, the possibility to wash oneself, the stuture removal) | -                                                | Patient reported (verbal) | Numerical scale 0 to 10 (0-4, poor; 5-6, mild;7-8, good; 9-10, excellent) | 15 days, 1, 3, 6 and 12 months                                                                                             | Pronio 2011     | 2              |

\* 1= Cochrane 2011 dressings review; 2= Cochrane 2014 tissue adhesive review; 3=Chow 2010 tissue adhesive review; 4=additional studies provided by authors of the Cochrane dressings review update



| Outcome as described by author                  | Wording used to measure outcome (where reported)                                      | Who reported the outcome                        | Rating/measurement scale                                     | Assessment time point                   | Study reference | Study source * |
|-------------------------------------------------|---------------------------------------------------------------------------------------|-------------------------------------------------|--------------------------------------------------------------|-----------------------------------------|-----------------|----------------|
| Discomfort                                      | -                                                                                     | Unspecified                                     | Unspecified                                                  | 15 days, 1, 3, 6 and 12 months          | Pronio 2011     | 2              |
| Pain                                            | -                                                                                     | Unspecified                                     | Unspecified                                                  | 15 days, 1, 3, 6 and 12 months          | Pronio 2011     | 2              |
| Pain                                            | Pain resulting from dressing usage and not including mobilisation                     | Patient reported                                | Yes/no, 10 point VAS (0=no problems, 10=unbearable problems) | At dressing removal (mean 6 and 7 days) | Ravnskog 2001   | 4              |
| Itching                                         | -                                                                                     | Patient reported                                | Yes/no, 10 point VAS (0=no problems, 10=unbearable problems) | At dressing removal (mean 6 and 7 days) | Ravnskog 2001   | 4              |
| Burning                                         | Burning pain referring solely to a dressing-related sensation felt under the dressing | Patient reported                                | Yes/no, 10 point VAS (0=no problems, 10=unbearable problems) | At dressing removal (mean 6 and 7 days) | Ravnskog 2001   | 4              |
| Discomfort during use of dressing               | -                                                                                     | Patient reported                                | Yes/no, 10 point VAS (0=no problems, 10=unbearable problems) | At dressing removal (mean 6 and 7 days) | Ravnskog 2001   | 4              |
| Pain at dressing removal                        | -                                                                                     | Patient reported                                | Yes/no, 10 point VAS (0=no problems, 10=unbearable problems) | At dressing removal (mean 6 and 7 days) | Ravnskog 2001   | 4              |
| Skin damage (erythema, blisters or skin injury) |                                                                                       | Observer reported                               | Small; 1-2cm, medium; 2-5cm, large<5cm                       | during hospital stay                    | Ravnskog 2001   | 4              |
| Satisfaction with the cosmetic result           | -                                                                                     | Patient reported                                | Dichotomous (satisfied/dissatisfied)                         | Day 10 and day 90                       | Romero 2011     | 2              |
| Pain at port sites                              | -                                                                                     | Surgeon reported                                | Unspecified                                                  | Day 10 and day 90                       | Romero 2011     | 2              |
| Satisfaction with cosmetic result               | -                                                                                     | Patients were asked by the senior dermatologist | 1 (very satisfied) to 5 (not satisfied)                      | 1 year post-op                          | Shamiyeh 2001   | 2,3            |
| Degree of pain                                  | -                                                                                     | Patient reported                                | Scale, 1-10                                                  | 3 months post-op                        | Sniezek 2007    | 2,3            |
| Ease of managing the surgical wound             | -                                                                                     | Patient reported                                | Scale, 1-10                                                  | 3 months post-op                        | Sniezek 2007    | 2,3            |

\* 1= Cochrane 2011 dressings review; 2= Cochrane 2014 tissue adhesive review; 3=Chow 2010 tissue adhesive review; 4=additional studies provided by authors of the Cochrane dressings review update

| <b>Outcome as described by author</b>                                         | <b>Wording used to measure outcome (where reported)</b> | <b>Who reported the outcome</b> | <b>Rating/measurement scale</b>                                         | <b>Assessment time point</b>   | <b>Study reference</b> | <b>Study source *</b> |
|-------------------------------------------------------------------------------|---------------------------------------------------------|---------------------------------|-------------------------------------------------------------------------|--------------------------------|------------------------|-----------------------|
| Ability to take a shower                                                      | -                                                       | Patient reported                | Scale, 1-10                                                             | 3 months post-op               | Sniezek 2007           | 2,3                   |
| Overall satisfaction                                                          | -                                                       | Patient reported                | Scale, 1-10                                                             | 3 months post-op               | Sniezek 2007           | 2,3                   |
| Cosmetic appearance                                                           | -                                                       | Patient reported                | Scale, 1-10                                                             | 3 months post-op               | Sniezek 2007           | 2,3                   |
| Comfort of the dressing (discomfort at mobilization)                          | -                                                       | Patient reported                | 3 point scale (no discomfort at all, minor problems, severe discomfort) | Daily for 4 days after surgery | Vogt 2007              | 1                     |
| Comfort of the dressing (pain at dressing changes)                            | -                                                       | Patient reported                | 3 point scale (no discomfort at all, minor problems, severe discomfort) | Daily for 4 days after surgery | Vogt 2007              | 1                     |
| Comfort of the dressing (skin problems)                                       | -                                                       | Patient reported                | 3 point scale (no discomfort at all, minor problems, severe discomfort) | Daily for 4 days after surgery | Vogt 2007              | 1                     |
| Signs of infection - redness, tenderness, swelling, exudates                  | -                                                       | Observer reported               | Unspecified                                                             | 2 weeks post-op                | Vogt 2007              | 1                     |
| Wound complications - haematoma or persistent lymph oozing, surgical revision | -                                                       | Observer reported               | Unspecified                                                             | 2 weeks post-op                | Vogt 2007              | 1                     |
| Length of hospital stay                                                       | -                                                       | Observer reported               | n/a                                                                     | n/a                            | Vogt 2007              | 1                     |
| Number of dressing changes                                                    | -                                                       | Observer reported               | n/a                                                                     | during postoperative stay      | Vogt 2007              | 1                     |
| Patient comfort (difficulty in removing the dressings)                        | -                                                       | Nurse reported                  | Unspecified                                                             | Day 5                          | Wikblad 1995           | 1                     |
| Patient comfort (pain at dressing removal)                                    | -                                                       | Nurse reported                  | 3 point scale from "no pain at all" to "very painful"                   | Day 5                          | Wikblad 1995           | 1                     |
| Number of bandage changes                                                     | -                                                       | Nurse reported                  | n/a                                                                     | Day 1 to day 5                 | Wikblad 1995           | 1                     |
| Reason for bandage changes                                                    | -                                                       | Nurse reported                  | n/a                                                                     | Day 1 to day 5                 | Wikblad 1995           | 1                     |

\* 1= Cochrane 2011 dressings review; 2= Cochrane 2014 tissue adhesive review; 3=Chow 2010 tissue adhesive review; 4=additional studies provided by authors of the Cochrane dressings review update

| Outcome as described by author                                         | Wording used to measure outcome (where reported)         | Who reported the outcome              | Rating/measurement scale                                                                                                                                                                                                                     | Assessment time point                   | Study reference | Study source * |
|------------------------------------------------------------------------|----------------------------------------------------------|---------------------------------------|----------------------------------------------------------------------------------------------------------------------------------------------------------------------------------------------------------------------------------------------|-----------------------------------------|-----------------|----------------|
| Effectiveness (wound healing)                                          | -                                                        | Independent raters judging photograph | 1=well healed (wound edges well together; a gap of <5% length of the incision allowed with no or slight redness), 2=partially healed (gaps >5% but <20% with slight to excessive redness), 3=poorly healed (gaps>20% with excessive redness) | Day 5 and 4 weeks after surgery         | Wikblad 1995    | 1              |
| Redness                                                                | -                                                        | Independent raters judging photograph | 0=no redness, 1=slight redness, 2= excessive redness                                                                                                                                                                                         | Day 5 and 4 weeks after surgery         | Wikblad 1995    | 1              |
| Wound healing                                                          | Do you think the wound is well/partially/poorly healed?  | Patient reported                      | 3 point scale                                                                                                                                                                                                                                | Once a week after discharge for 3 weeks | Wikblad 1995    | 1              |
| Skin changes                                                           | -                                                        | Patient reported                      | Unspecified                                                                                                                                                                                                                                  | Once a week after discharge for 3 weeks | Wikblad 1995    | 1              |
| Redness                                                                | Is the wound red?                                        | Patient reported                      | Yes/No                                                                                                                                                                                                                                       | Once a week after discharge for 3 weeks | Wikblad 1995    | 1              |
| Swelling                                                               | Does the wound look swollen?                             | Patient reported                      | Yes/No                                                                                                                                                                                                                                       | Once a week after discharge for 3 weeks | Wikblad 1995    | 1              |
| Itching                                                                | Does the wound itch?                                     | Patient reported                      | Yes/No                                                                                                                                                                                                                                       | Once a week after discharge for 3 weeks | Wikblad 1995    | 1              |
| Skin changes (erythema and blisters)                                   | -                                                        | Independent raters judging photograph | n/a                                                                                                                                                                                                                                          | Day 5                                   | Wikblad 1995    | 1              |
| Clinical utility (ability to allow ongoing evaluation of the incision) | How well the incision could be seen through the dressing | Nurse reported                        | 1=good, 2=partially, 3=not at all                                                                                                                                                                                                            | Day 1 to day 5                          | Wikblad 1995    | 1              |
| How much the dressing had loosened                                     | -                                                        | Nurse reported                        | graded scale from 1 to 3                                                                                                                                                                                                                     | Day 1 to day 5                          | Wikblad 1995    | 1              |
| Treatment with antibiotics                                             | -                                                        | Nurse reported                        | yes/no                                                                                                                                                                                                                                       | 4 weeks after surgery                   | Wikblad 1995    | 1              |

\* 1= Cochrane 2011 dressings review; 2= Cochrane 2014 tissue adhesive review; 3=Chow 2010 tissue adhesive review; 4=additional studies provided by authors of the Cochrane dressings review update

| <b>Outcome as described by author</b>          | <b>Wording used to measure outcome (where reported)</b> | <b>Who reported the outcome</b> | <b>Rating/measurement scale</b>                                                                                                                | <b>Assessment time point</b> | <b>Study reference</b> | <b>Study source *</b> |
|------------------------------------------------|---------------------------------------------------------|---------------------------------|------------------------------------------------------------------------------------------------------------------------------------------------|------------------------------|------------------------|-----------------------|
| Safety (presence of infection - wound culture) | -                                                       | Clinical sample                 | n/a - lab sample                                                                                                                               | Day 5                        | Wikblad 1995           | 1                     |
| Dressing awareness                             | How aware are you of your dressing most of the time?    | Patient reported                | 10 cm visual analogue scale with three anchors at 0,5 and 10cm                                                                                 | Day 1 to day 5               | Wynne 2004             | 1                     |
| Movement limitation                            | Does the dressing limit you in moving about?            | Patient reported                | 10 cm visual analogue scale with three anchors at 0,5 and 10cm                                                                                 | Day 1 to day 5               | Wynne 2004             | 1                     |
| Comfort with removal                           | How comfortable do you feel during dressing changes?    | Patient reported                | 10 cm visual analogue scale with three anchors at 0,5 and 10cm                                                                                 | Day 1 to day 5               | Wynne 2004             | 1                     |
| Overall satisfaction                           | How satisfied overall do you feel with your dressing?   | Patient reported                | 10 cm visual analogue scale with three anchors at 0,5 and 10cm                                                                                 | Day 1 to day 5               | Wynne 2004             | 1                     |
| Wound healing - approximation                  | -                                                       | Observer reported               | 4 categories (total, partial;<2cm of superficial separation, moderate;>2cm of superficial separation, dehisced; complete separation of layers) | Day 1 to day 5               | Wynne 2004             | 1                     |
| Wound healing - skin integrity                 | -                                                       | Observer reported               | 3 categories (normal; pink no redness, inflamed; heat redness swelling, macerated within a 2.5cm border of the incision)                       | Day 1 to day 5               | Wynne 2004             | 1                     |
| Wound infection                                | -                                                       | Observer reported               | CDC criteria                                                                                                                                   | unspecified                  | Wynne 2004             | 1                     |
| Dressing integrity                             | -                                                       | Observer reported               | 3 categories - suture line exposed, poorly sealed, well sealed                                                                                 | unspecified                  | Wynne 2004             | 1                     |
| Experience with wound                          | Has your chest wound healed?                            | Patient reported                | Yes/No                                                                                                                                         | One month post-discharge     | Wynne 2004             | 1                     |
| Antibiotic therapy                             | Has your doctor given you any antibiotics for           | Patient reported                | Yes/No                                                                                                                                         | One month post-discharge     | Wynne 2004             | 1                     |

\* 1= Cochrane 2011 dressings review; 2= Cochrane 2014 tissue adhesive review; 3=Chow 2010 tissue adhesive review; 4=additional studies provided by authors of the Cochrane dressings review update

| <b>Outcome as described by author</b> | <b>Wording used to measure outcome (where reported)</b>                                                                                                                                    | <b>Who reported the outcome</b> | <b>Rating/measurement scale</b> | <b>Assessment time point</b> | <b>Study reference</b> | <b>Study source *</b> |
|---------------------------------------|--------------------------------------------------------------------------------------------------------------------------------------------------------------------------------------------|---------------------------------|---------------------------------|------------------------------|------------------------|-----------------------|
|                                       | your chest wound, since you left hospital?                                                                                                                                                 |                                 |                                 |                              |                        |                       |
| Experience with wound                 | Over the past month, has there been any fluid/discharge oozing from the chest wound?<br>If so, how would you describe the fluid: watery, straw coloured; blood stained; pus (think yellow) | Patient reported                | Yes/No                          | One month post-discharge     | Wynne 2004             | 1                     |
| Experience with wound                 | Was a dressing required on your wound?                                                                                                                                                     | Patient reported                | Yes/No                          | One month post-discharge     | Wynne 2004             | 1                     |
| Experience with wound                 | Have you had any of the following problems with your chest wound?<br>Redness, swelling, pain, tenderness                                                                                   | Patient reported                | Yes/No                          | One month post-discharge     | Wynne 2004             | 1                     |
| Experience with wound                 | Has your local doctor told you at any time your chest wound was infected?                                                                                                                  | Patient reported                | Yes/No                          | One month post-discharge     | Wynne 2004             | 1                     |

\* 1= Cochrane 2011 dressings review; 2= Cochrane 2014 tissue adhesive review; 3=Chow 2010 tissue adhesive review; 4=additional studies provided by authors of the Cochrane dressings review update
